# Supplementary material for: Yap activation in irradiated parotid salivary glands is regulated by ROCK activity
Source: PubMed Central journal article supplement (PMC7644026; doi:10.1371/journal.pone.0232921), 2020-11-05
Supplement: pone.0232921.s001.pdf [file pone.0232921.s001.pdf]

2

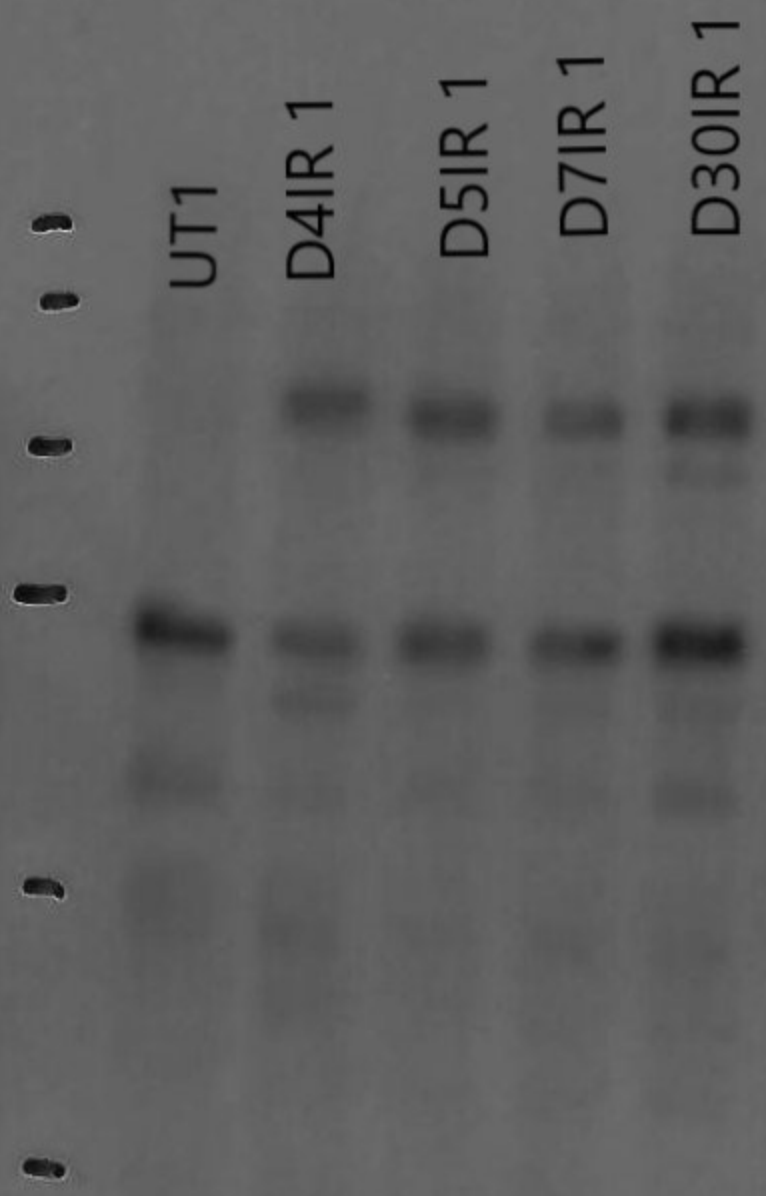

testing other conditions not related  
to Fig 1A

---

<-probe for  
something else  
  
<-pYap(S127)

PYAP (S127) (1:1000)  
Rb-HRP  
ECL (3 min)

Figure1A

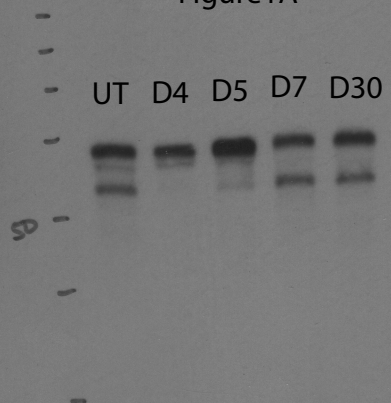

UT1

D4IR 1

D5IR 1

D30IR 1

UT2

D4IR 2

D5IR 2

D30IR 2

UT3

D4IR 3

D5IR 3

D30IR 3

<-Taz

<-ERK1/2

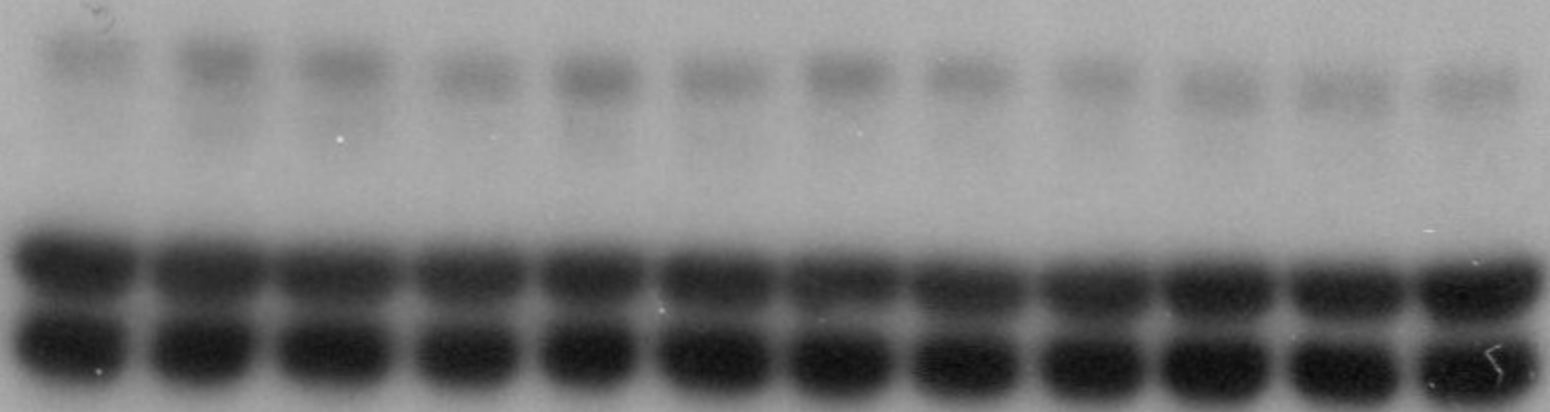

199707 164f samples

PYAP(S127) (1:1000) regular to SS

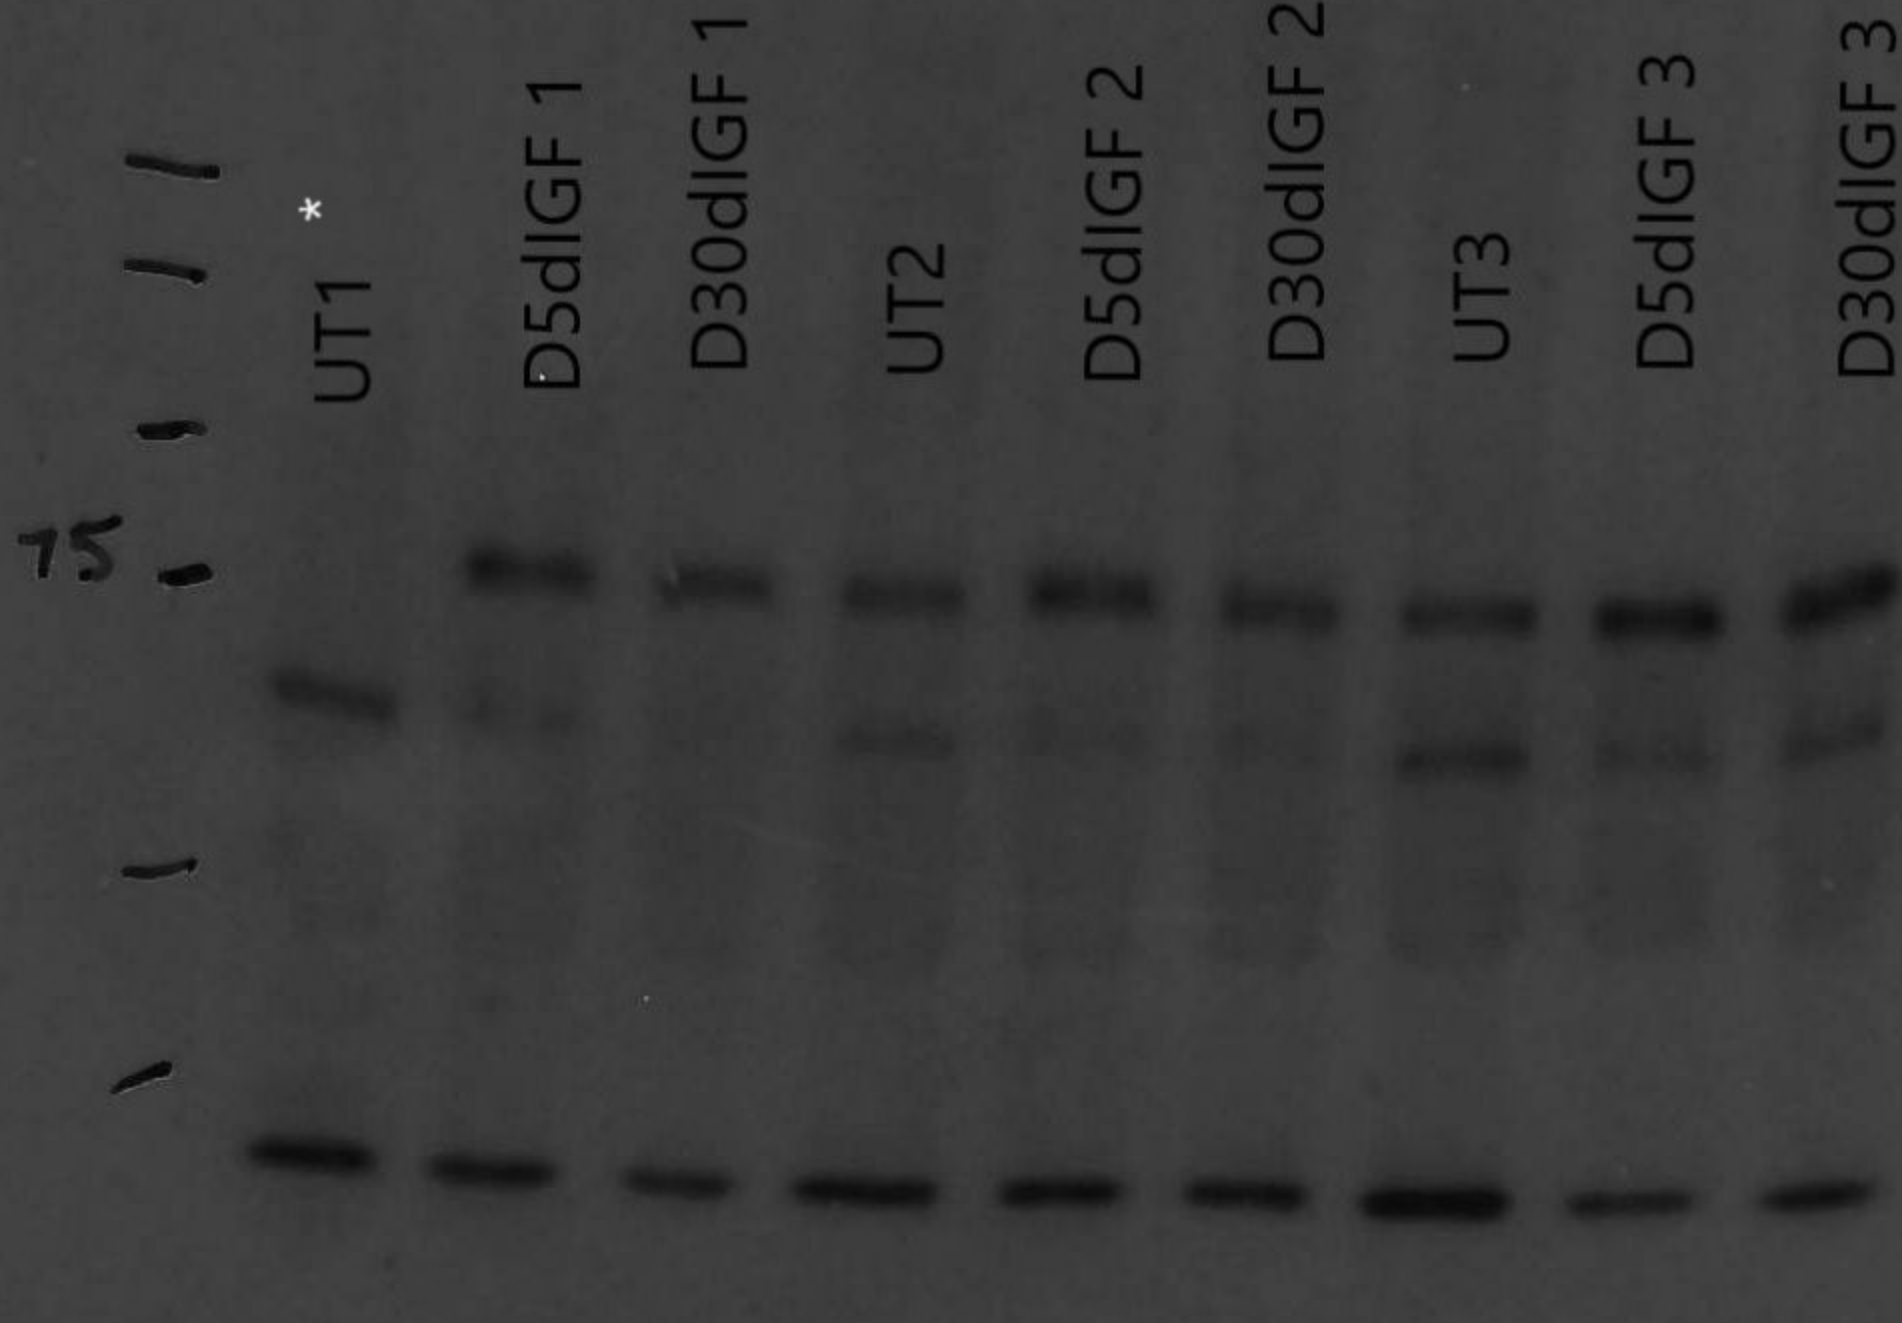

<- pYap  
<- probed for something else

<- probed for something else

10 sec

\*Note: It looks like there's no pYap for UT1 but if you view blot at 1min it's there

19990116F

Total YAP (1:1000) stripped from  
26-11-01 SS

15  
1 1 1 1

1

UT1  
D5dIGF 1  
D30dIGF 1

UT2  
D5dIGF 2  
D30dIGF 2

UT3  
D5dIGF 3  
D30dIGF 3

<-Total Yap

<-probed for something else

<-probed for something else

30sec

TAZ (1:1000) Western blot

UT1  
D5dIGF1  
D30dIGF1  
UT2  
D5dIGF2  
D30dIGF2  
UT3  
D5dIGF3  
D30dIGF3

<-Taz  
other protein  
other protein

ERK1/2 (1:1000) Alpha Mo-55

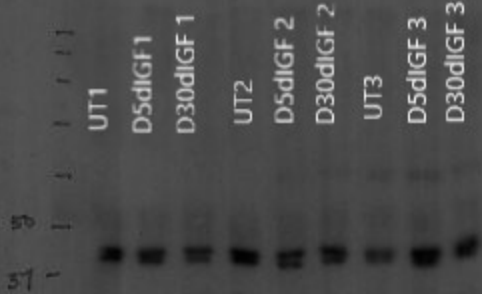

←-ERK1/2

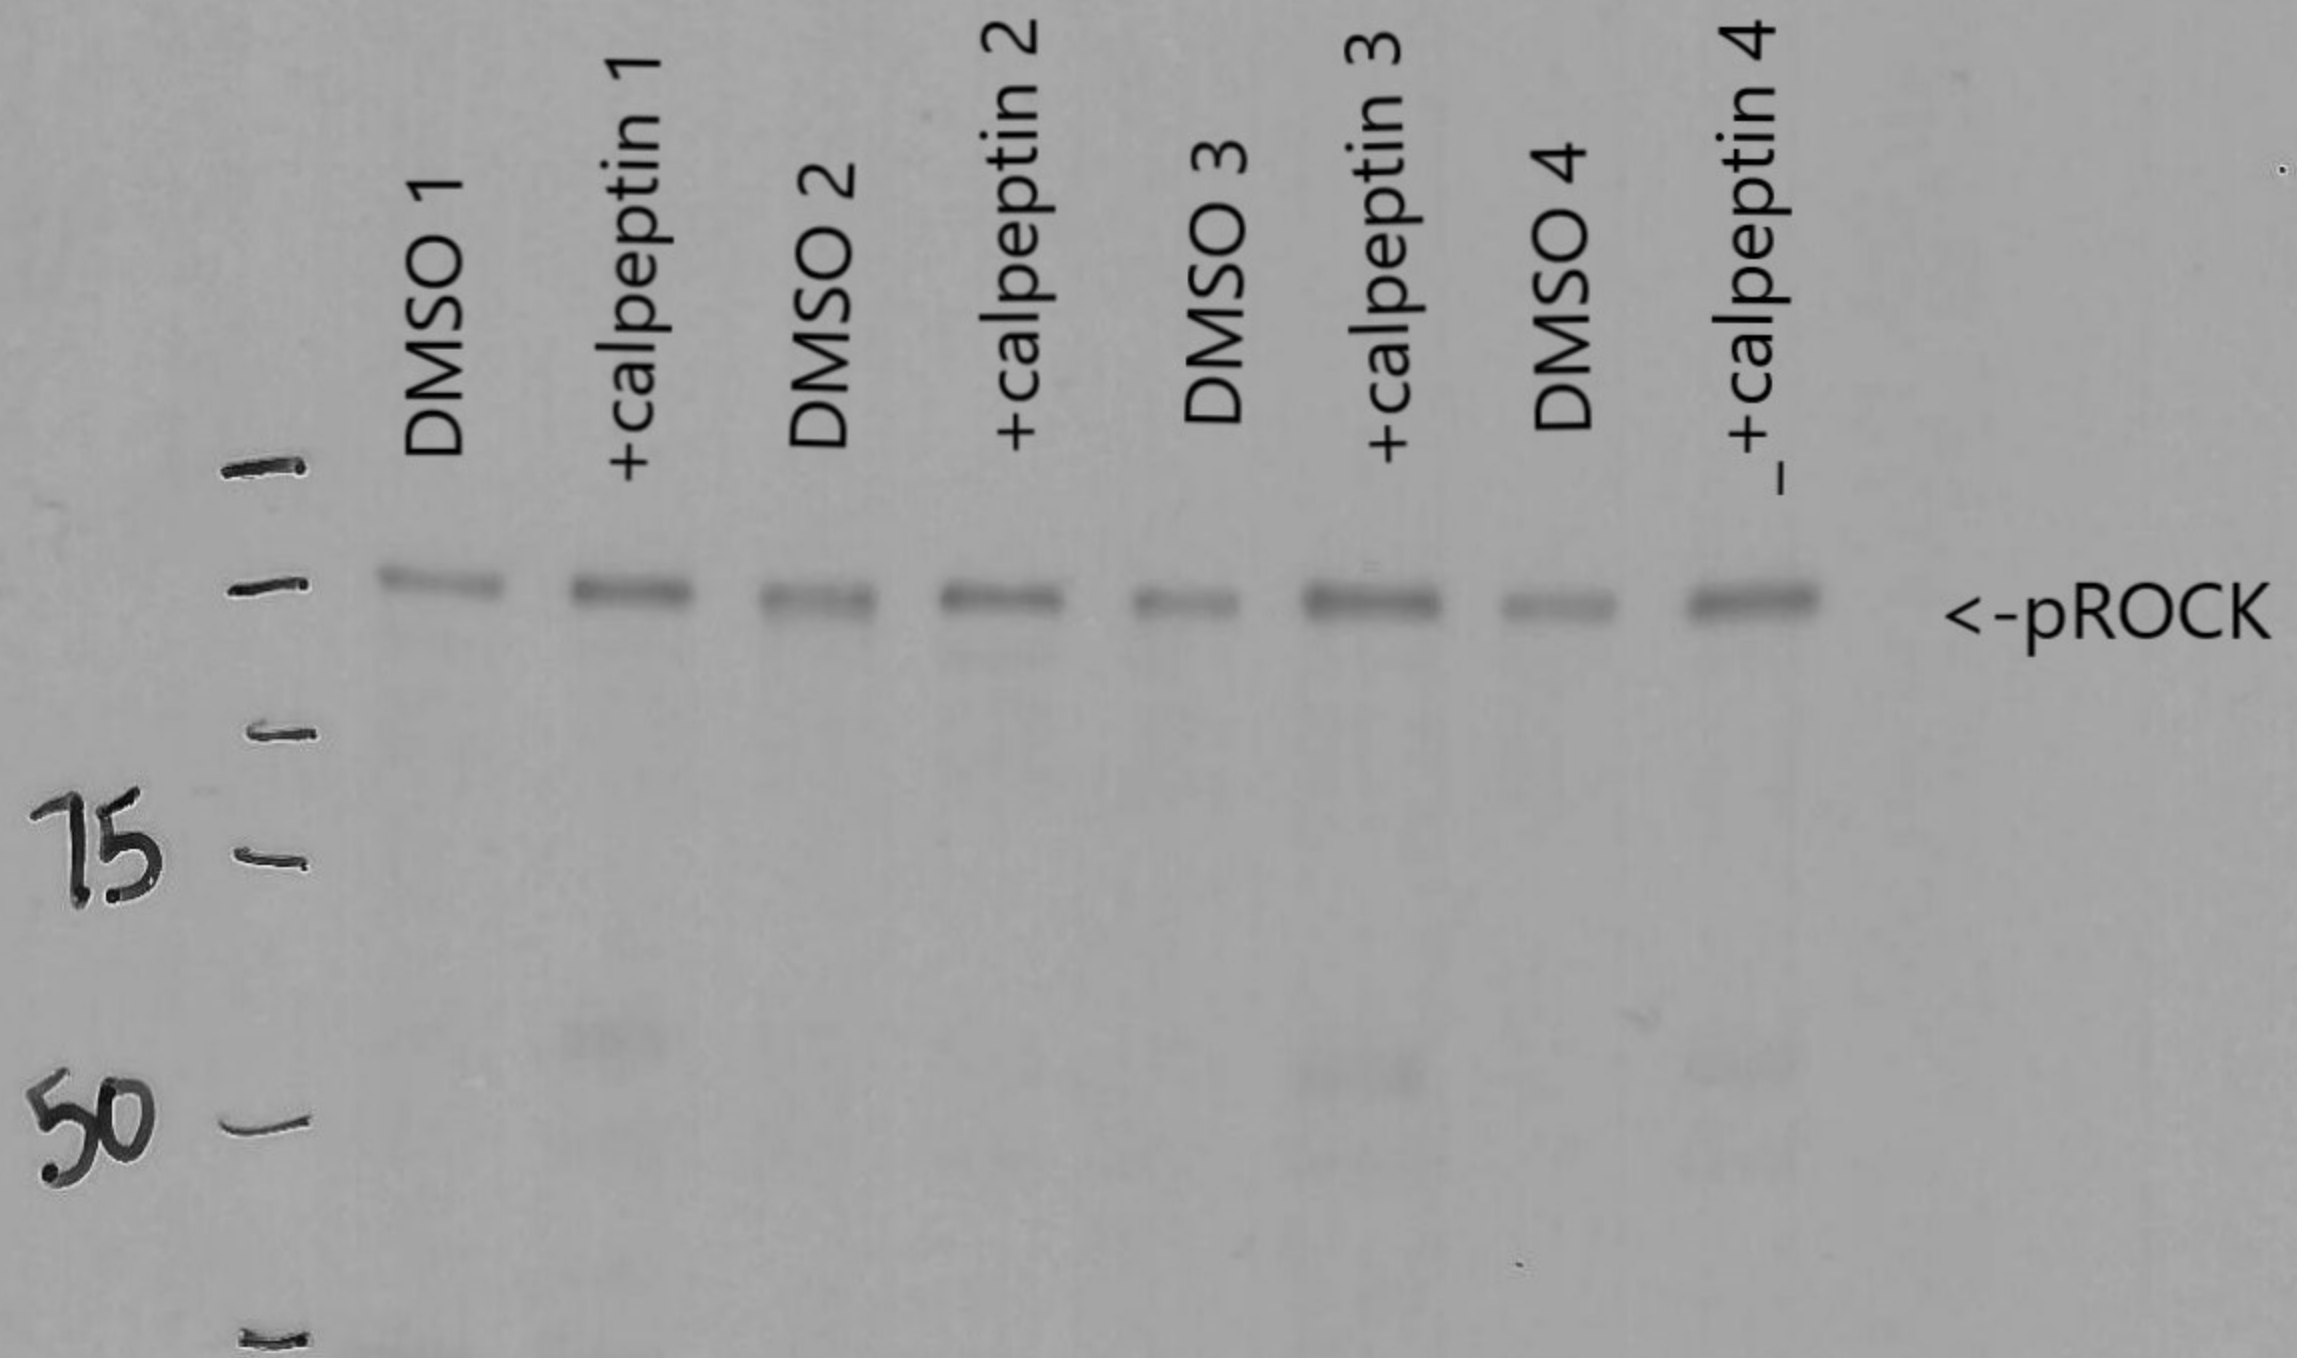

Sydney

19AW21  
pROCK1 (1:1000)  
Rb-HRP  
ECL (3 min)  
DMSO & 10μM calpeptin



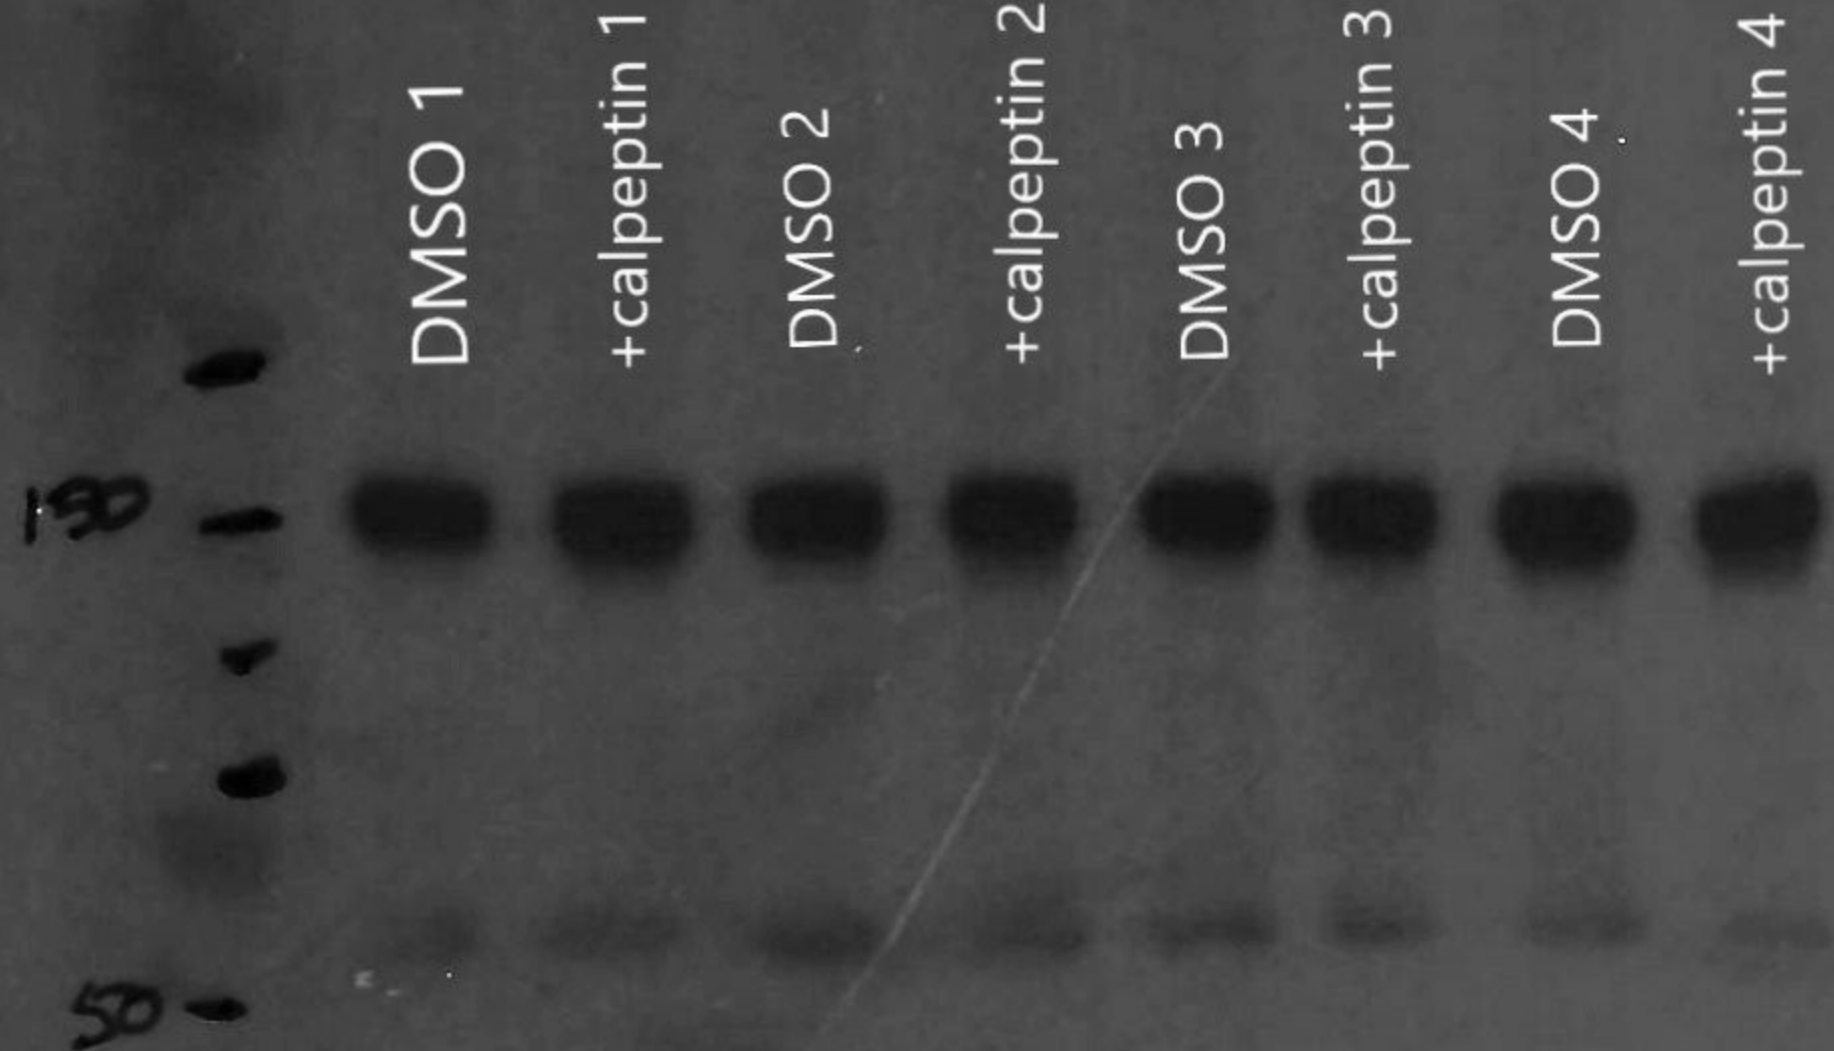

<-ROCK

<-probed for something else

Sudney

190kDa  
Total  
ROCK1 (1:1000)  
E6-HERP (good one)  
ECL  
DMSO + 10uM calpeptin

20K4175

8/27/20  
Funto 30sec

Figure 3E/F

Figure 3C/D

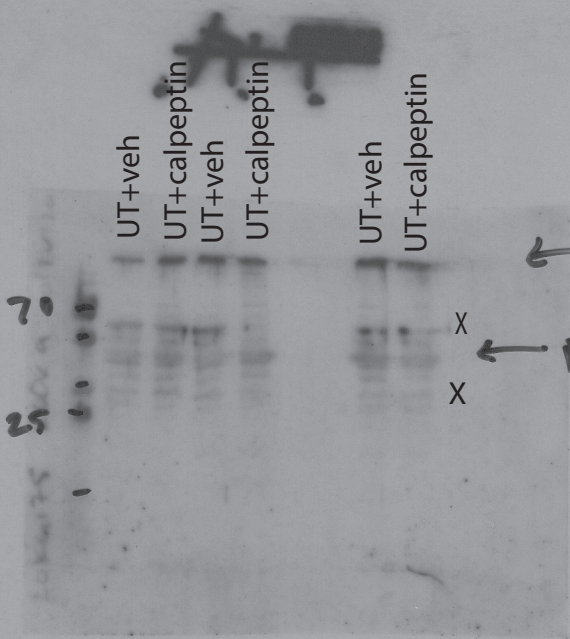

← p4MK2 1:1000

← pMLC 1:1000

X

X

20K6175

Fento 5S  
8128120

20K6175

Not used in manuscript

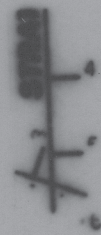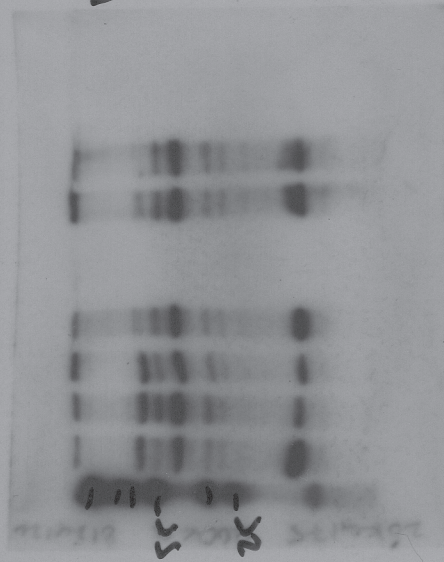

Figure 3E/F

LIMK2  
1-1000

MLC  
1-1000

Figure 3C/D

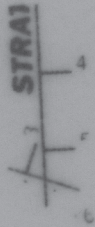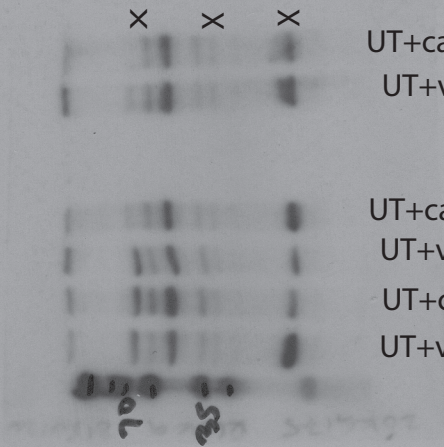

UT+calpeptin  
UT+veh

UT+calpeptin  
UT+veh

UT+calpeptin  
UT+veh

X X X

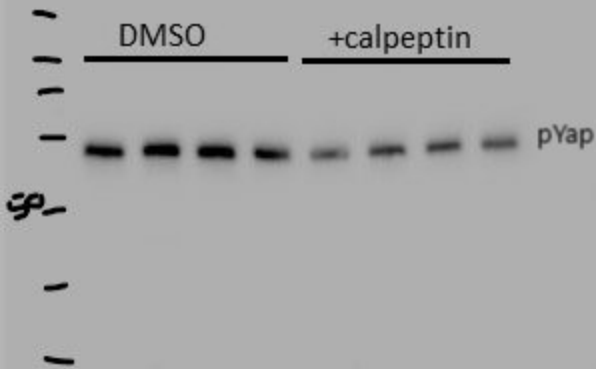

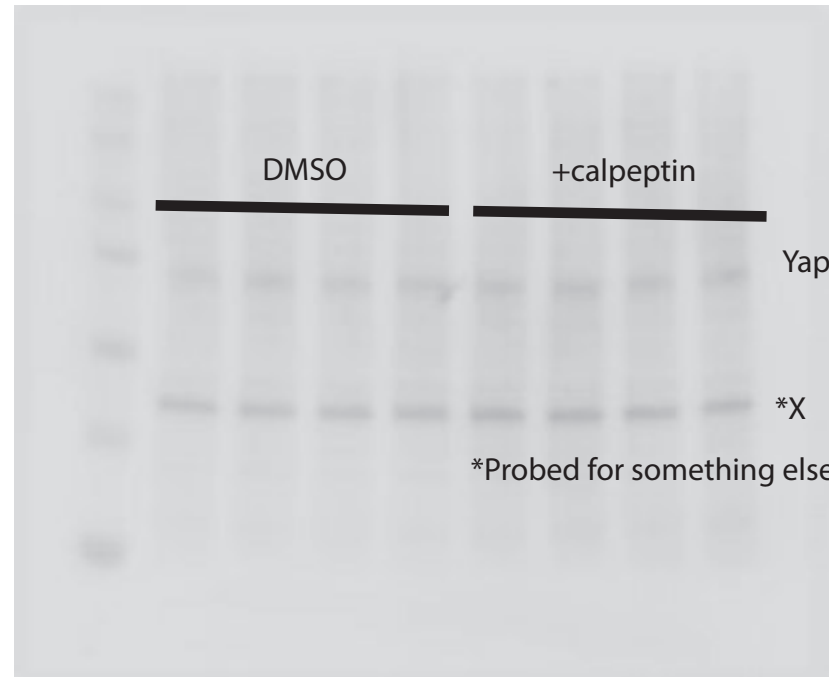

5

! ! !  
DMSO #1  
+Y27632 #1  
IR #1  
IR+Y27632 #1

<-pLIMK

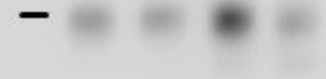

026120  
SSFento Ymir

UT+vehicle  
UT+ Y27632  
5Gy+vehicle  
5Gy+Y27632

Samples reanalyzed to confirm values  
but not used for figures

Figure 4C

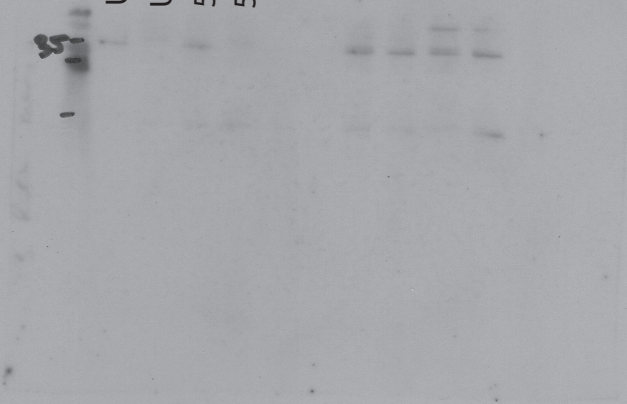

PMIC  
1:1000

2026173

Not used for manuscript

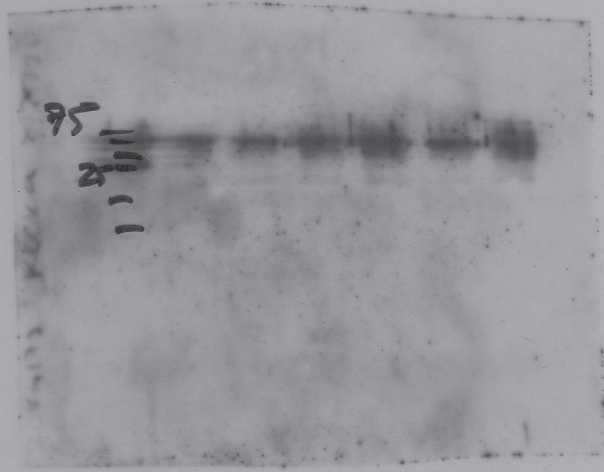

PMIC2  
1:1000

PMIC  
1:1000

2026172

8/18/20

Figure 4D

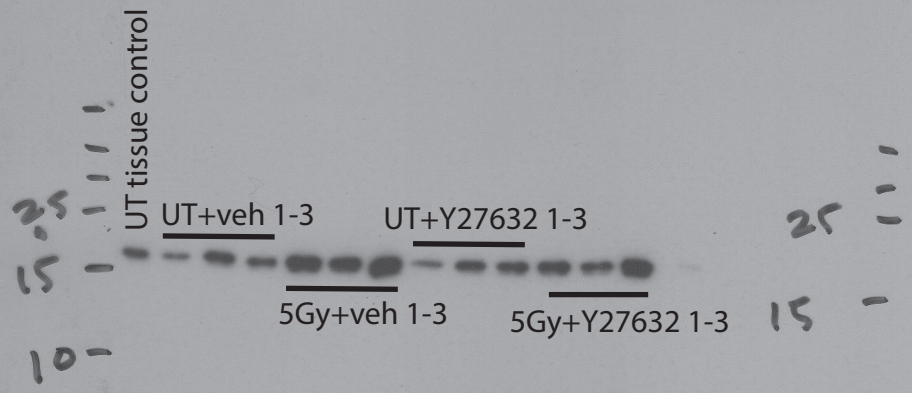

Did not use in manuscript

20K6.162

MCC  
1:1000

20K6.164

MCC  
1:1000

20K6.166

PRKX 1:1000  
PLINK2 1:1000

PRKX  
1:1000

Did not use in manuscript

pMCC  
1:1000

20K6.167

pCREB  
1:1000

Did not use in manuscript



P127/20  
Femto 15

UT+vehicle  
UT+Y27632  
5Gy+vehicle  
5Gy+Y27632

Samples reanalyzed to confirm values  
but not used for figures

Not used for manuscript

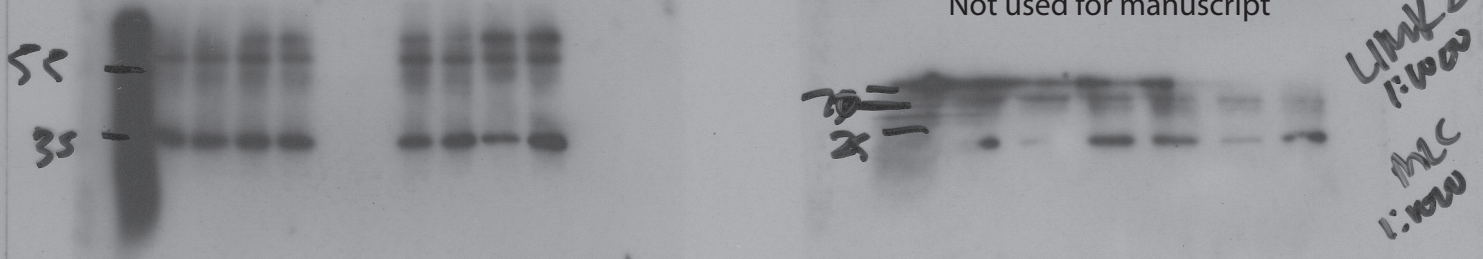

2026.173

MLC  
1:1000

20kG172

Figure 4C

2026151-162

8175120

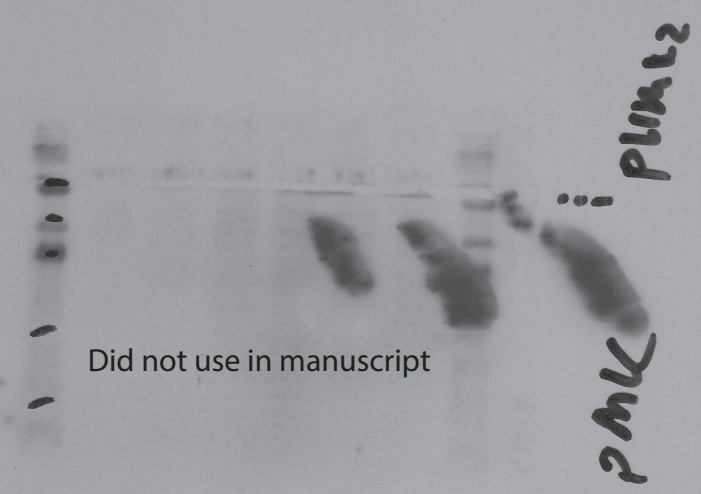

Did not use in manuscript

All FLOW  
in 50 BSA  
305

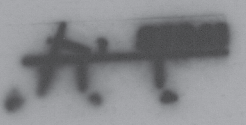

Figure 4D

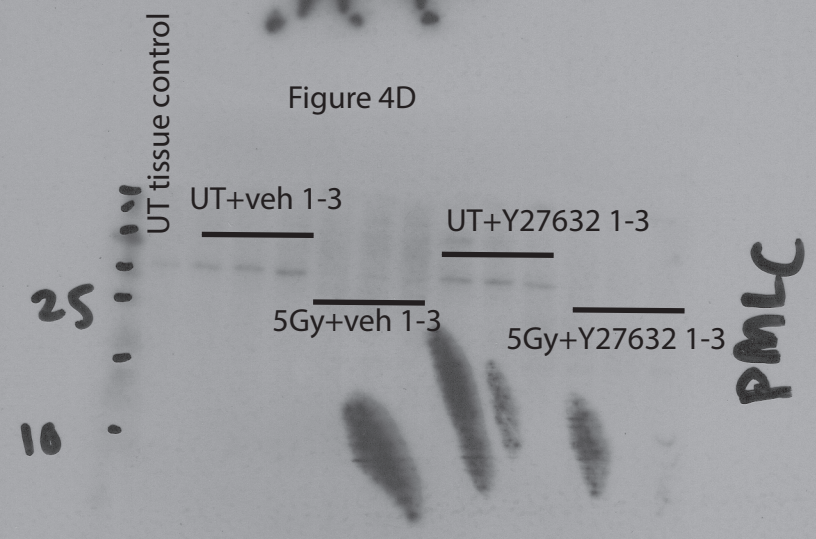

Logan/Sydney  
19 Feb  
24 Feb (1:1000)

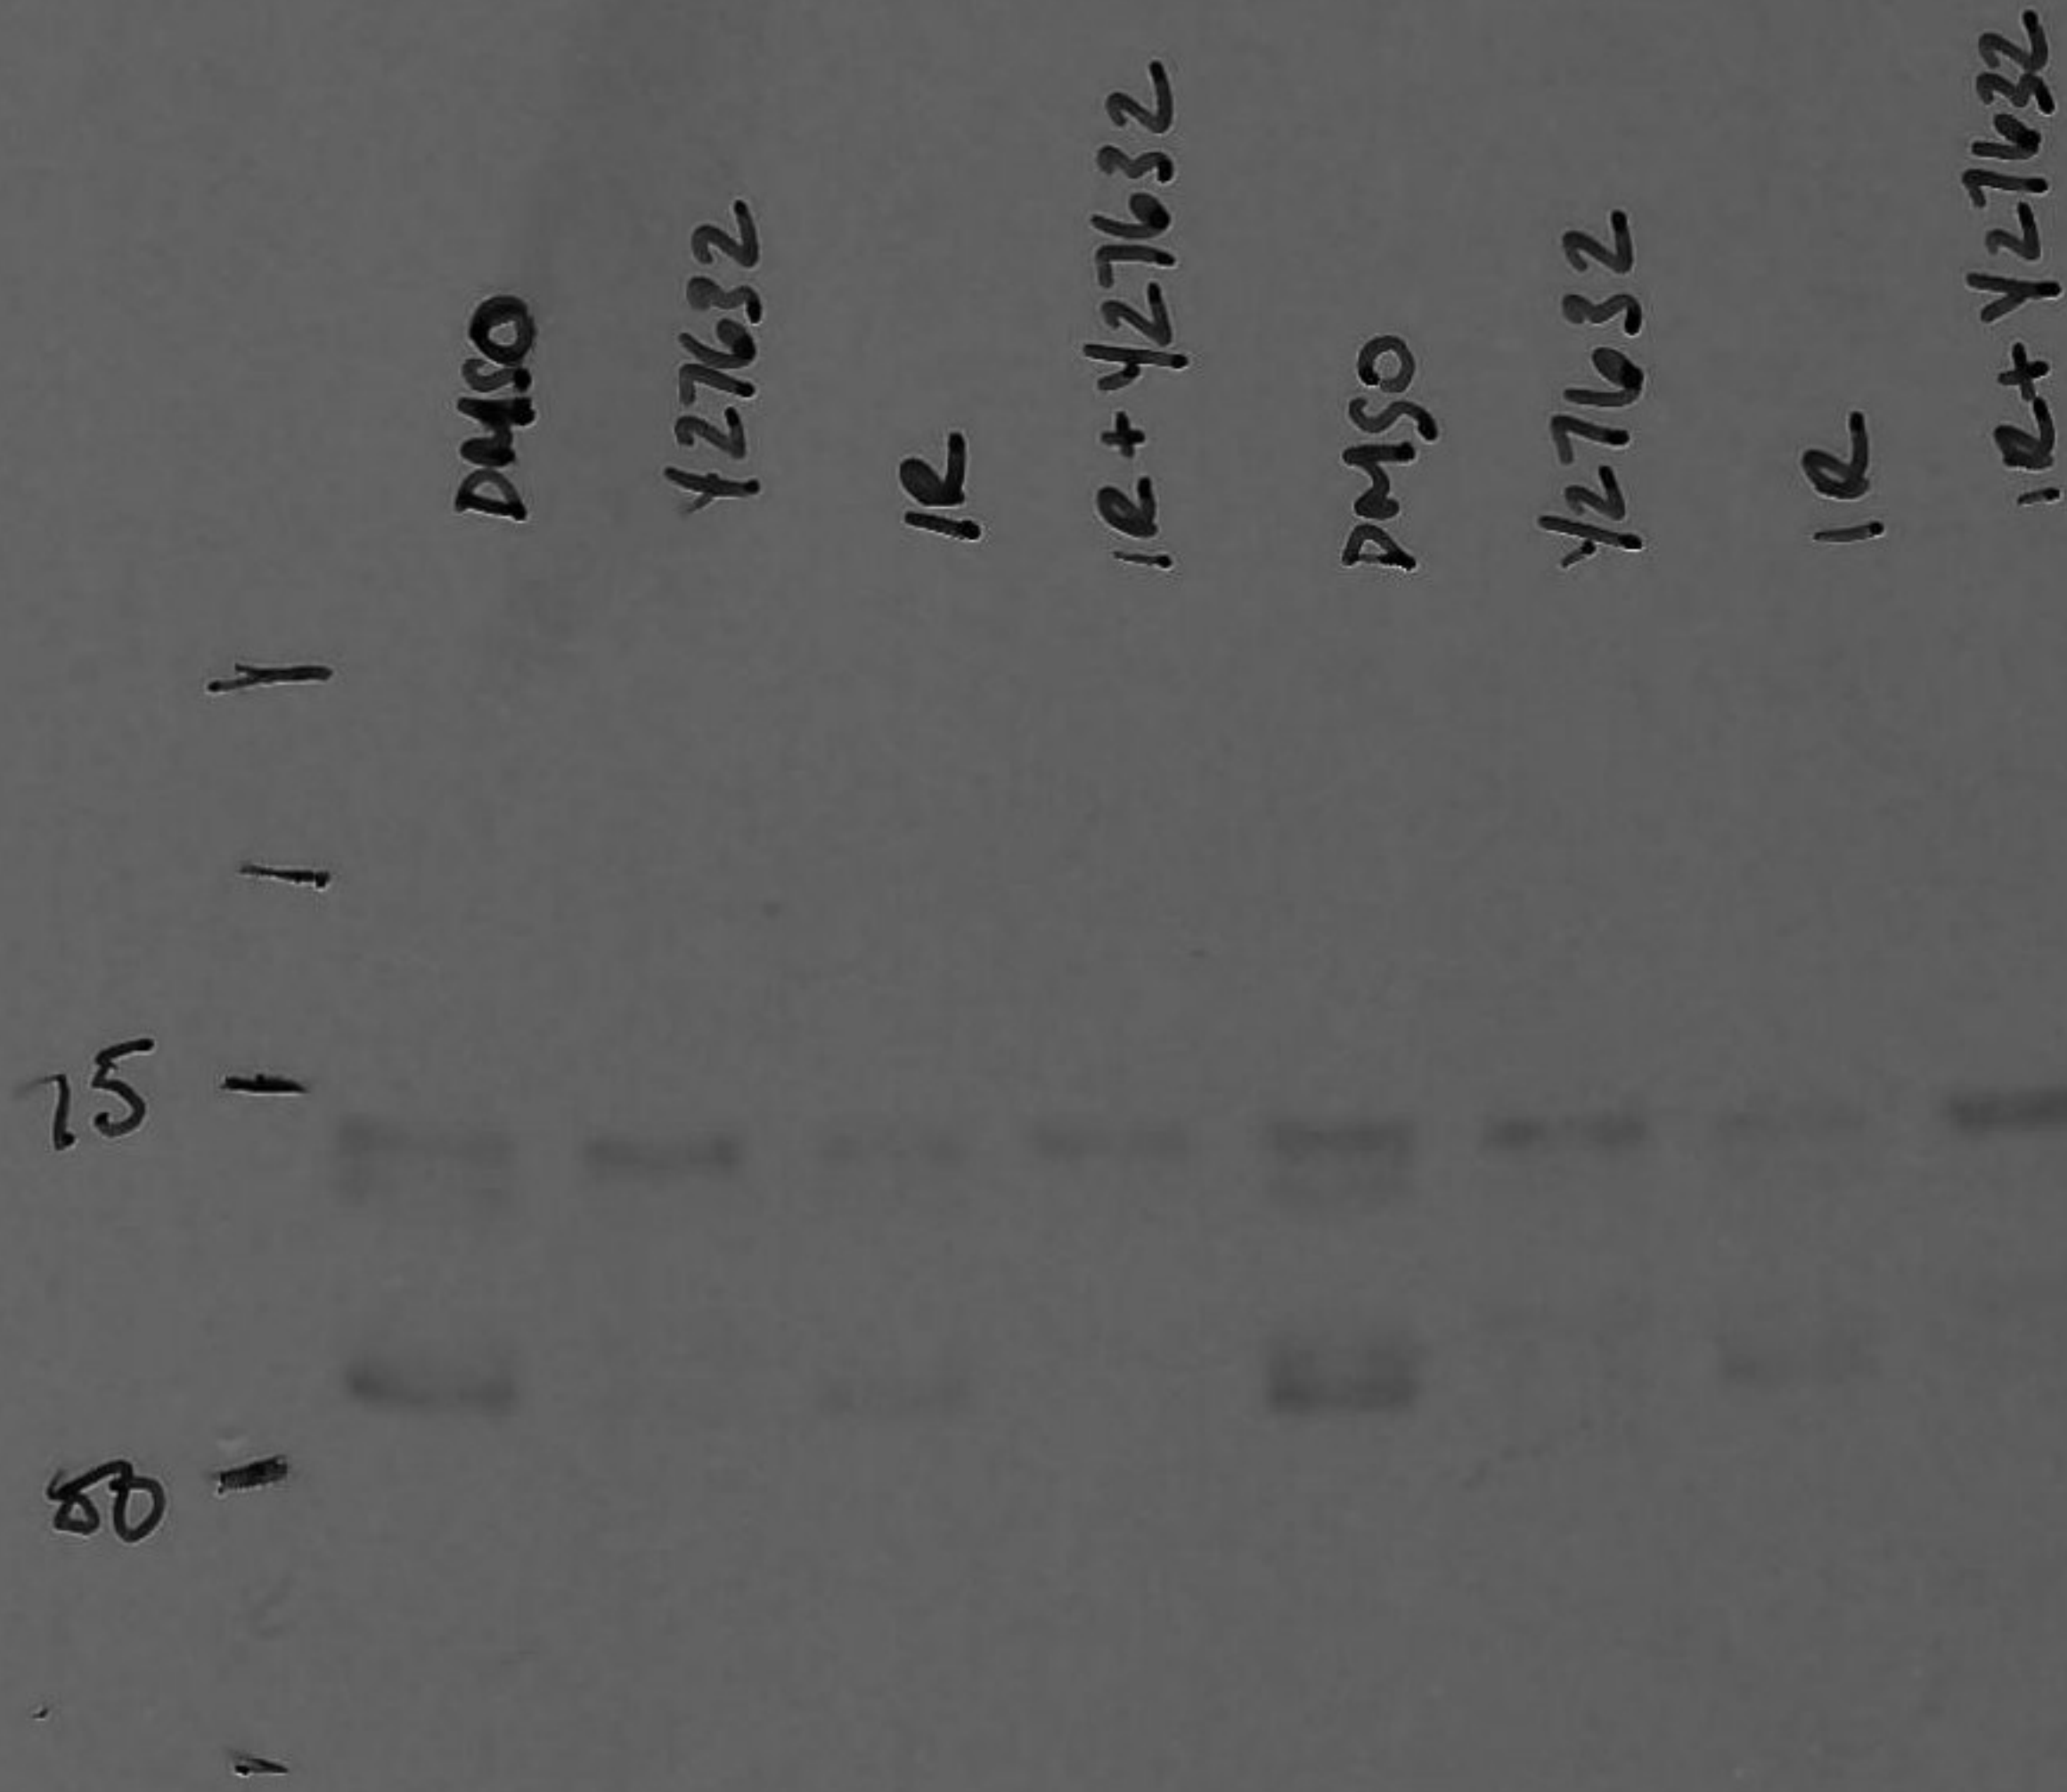

SB

/ / / / / / / /

DMSO

Y27632 #1

IR #1

IR+Y27632 #1

DMSO #2

Y27632 #2

IR #2

IR+Y27632 #2

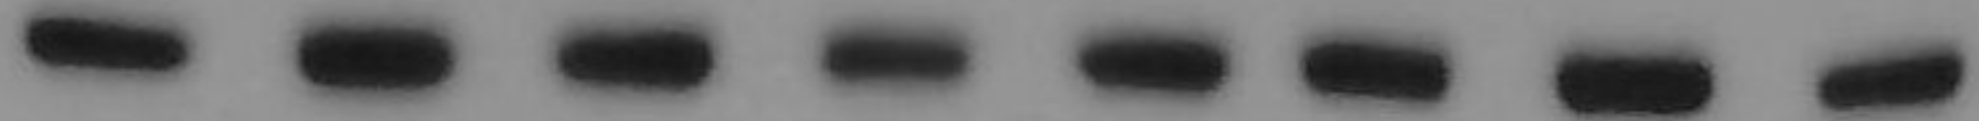

<-Total Yap

logant. sudhary  
19/11/18  
Total Yap (10000)  
20 - total SS (3 min)  
Pohi
